# Supplementary material
Source: MDPI journal article supplement (https://www.mdpi.com/2311-7524/9/1/120)

**Table S1 Contents of major chemical components in tea leaves after foliar spraying of nano-Se (%)**

| Treatments        | CK          | D1          | D2          | D3          | D4          |
|-------------------|-------------|-------------|-------------|-------------|-------------|
| Total polyphenols | 24.33±0.43a | 22.44±0.30c | 22.51±0.27c | 21.97±0.35d | 22.86±0.24b |
| Amino acid        | 2.39±0.07b  | 2.68±0.25a  | 2.58±0.26a  | 2.58±0.18a  | 2.28±0.01c  |
| Theanine          | 1.15±0.07c  | 1.40±0.10a  | 1.22±0.12b  | 1.35±0.07a  | 1.18±0.01bc |
| TP/AA             | 10.18a      | 8.39b       | 8.74b       | 8.53b       | 10.03a      |

Data were analysed by one-way ANOVA.

**Table S2 Contents of catechins in tea leaves after foliar spraying of nano-Se (mg/g)**

|                 | CK           | D1           | D2           | D3           | D4           |
|-----------------|--------------|--------------|--------------|--------------|--------------|
| EGC             | 24.95±0.87b  | 22.78±0.70c  | 23.51±0.17bc | 26.87±0.31a  | 26.91±1.07a  |
| C               | 8.99±0.14ab  | 8.26±0.25c   | 8.66±0.24bc  | 8.91±0.29ab  | 9.23±0.17a   |
| EC              | 5.45±0.05bc  | 5.05±0.11d   | 5.28±0.03c   | 5.52±0.09ab  | 5.68±0.15a   |
| EGCG            | 62.25±2.41a  | 53.57±1.49b  | 57.30±0.35b  | 62.08±1.20a  | 65.55±2.45a  |
| GCG             | 22.3±0.79ab  | 18.71±0.98d  | 19.97±0.52cd | 22.01±1.42bc | 24.37±0.77a  |
| ECG             | 13.33±0.17a  | 10.66±0.36c  | 12.41±0.24b  | 12.45±0.09b  | 13.74±0.65a  |
| Total catechins | 137.30±4.08b | 119.03±3.41d | 127.12±0.99c | 137.86±3.18b | 145.48±4.09a |
| Caffeine        | 39.20±0.19a  | 36.41±0.57b  | 37.06±0.05b  | 36.28±0.41b  | 37.19±0.75b  |

Data were analysed by one-way ANOVA.

**Table S3. List of primers used in this study**

| Primer names           | Primer sequence (5'-3')      | Usage                  |
|------------------------|------------------------------|------------------------|
| <i>CsLAR</i> -F        | GTGCGGCGATTGATAGAA           | qRT-PCR                |
| <i>CsLAR</i> -R        | GCAGGATGGTCGGAATG            | qRT-PCR                |
| <i>CsUGT84A</i> -F     | GATCAAGTGACCGATGCC           | qRT-PCR                |
| <i>CsUGT84A</i> -R     | ATACCTAACTTCTCCTCCTCA        | qRT-PCR                |
| <i>CsWRKY70</i> -F     | AAGAATCCAAGAGGACCCA          | qRT-PCR                |
| <i>CsWRKY70</i> -R     | CGAAGCGAATTGTGAACG           | qRT-PCR                |
| <i>β-actin</i> -F      | GCCATCTTTGATTGGAATGG         | qRT-PCR                |
| <i>β-actin</i> -R      | GGTGCCACAACCTTGATCTT         | qRT-PCR                |
| <i>CsLAR-pro</i> -F    | TCACCGTGTGGCTCCG             | Promoter clone         |
| <i>CsLAR-pro</i> -R    | TGCGGACACAGATTCCAACA         | Promoter clone         |
| <i>CsUGT84A-pro</i> -F | CTCCGACGATCAAGTTAGCACA       | Promoter clone         |
| <i>CsUGT84A-pro</i> -R | GAAGGAGACTAGGAAGACATGGAC     | Promoter clone         |
| <i>CsWRKY70</i> -F     | ATGGGTGGTGTATGATACTACTTTTC   | Full-length gene clone |
| <i>CsWRKY70</i> -R     | CTAAATGAACTCACTCTCATCAAAATGG | Full-length gene clone |

|                           |                                                          |                                           |
|---------------------------|----------------------------------------------------------|-------------------------------------------|
| <i>CsWRKY70</i> -GFP-F    | caaattcgcgaccggt<br>ATGGGTGGTGATGATACTACTTTTC            | Subcellular localization                  |
| <i>CsWRKY70</i> -GFP-R    | tgctagtcataccggt<br>AATGAACTCACTCTCATCAAAATGG            | Subcellular localization                  |
| <i>CsWRKY70</i> -BD-F     | gatggaggccgaattc<br>ATGGGTGGTGATGATACTACTTTTC            | Transcriptional activity analysis         |
| <i>CsWRKY70</i> -BD-R     | gccgctgcaggtcgacg<br>CTAAATGAACTCACTCTCATCAAAATGG        | Transcriptional activity analysis         |
| <i>CsWRKY70</i> -pBD-F    | tcgccgaccgtaggcct<br>ATGGGTGGTGATGATACTACTTTTC           | Transcriptional activity analysis         |
| <i>CsWRKY70</i> -pBD-R    | aaccagagttaaaggcct<br>AATGAACTCACTCTCATCAAAATGG          | Transcriptional activity analysis         |
| <i>CsWRKY70</i> -N-F      | ATGGAAGATGGTCATGCATGGA                                   | Gene clone                                |
| <i>CsWRKY70</i> -N-R      | TCAGCATGTATGGTGGCC                                       | Gene clone                                |
| GST- <i>CsWRKY70</i> -N-F | Ggttcgcgctggatcc<br>ATGGAAGATGGTCATGCATGGA               | Protein expression and purification       |
| GST- <i>CsWRKY70</i> -N-R | Agtcacgatgcggccgc<br>TCAGCATGTATGGTGGCC                  | Protein expression and purification       |
| <i>CsWRKY70</i> -pEAQ-F   | caaattcgcgaccggt<br>ATGGGTGGTGATGATACTACTTTTC            | Transient expression                      |
| <i>CsWRKY70</i> -pEAQ-R   | agttaaaggcctcgag<br>AATGAACTCACTCTCATCAAAATGG            | Transient expression                      |
| <i>CsLAR</i> -0800-F      | Tataggcgcaattgggtacc TCACCGTGTGGCTCCG                    | Transient expression                      |
| <i>CsLAR</i> -0800-R      | Ttggcgtcttccatgg<br>TGCGGACACAGATTCCAACA                 | Transient expression                      |
| <i>CsUGT84A</i> -0800-F   | tataggcgcaattgggtacc<br>CTCCGACGATCAAGTTAGCACA           | Transient expression                      |
| <i>CsUGT84A</i> -0800-R   | ttggcgtcttccatgg<br>GAAGGAGACTAGGAAGACATGGAC             | Transient expression                      |
| <i>CsLAR-Probe-F</i>      | GAGCTTTTTGATTTTTTGTACTTTTTGTAA<br>GAGAAAGAATGTAATGATTATG | Electrophoretic mobility assays<br>(EMSA) |
| <i>CsLAR-Probe-R</i>      | CATAATCATTACATTCTTTCTCTTACAAAA<br>AGTCAAAAAAATCAAAAAGCTC | Electrophoretic mobility assays<br>(EMSA) |
| <i>CsUGT84A-Probe-F</i>   | CTGGAGATTGGTTGTGCCGGTCAGCCAAC<br>AACCTTCTCGGCCACGTTCCAA  | Electrophoretic mobility assays<br>(EMSA) |
| <i>CsUGT84A-Probe-R</i>   | TTGGAACGTGGCCGAGAAGGTTGTTGGC<br>TGACCGGCACAACCAATCTCCAG  | Electrophoretic mobility assays<br>(EMSA) |

**Figure S1. Gene expression levels of differentially expressed catechin biosynthesis-related genes from transcriptome**

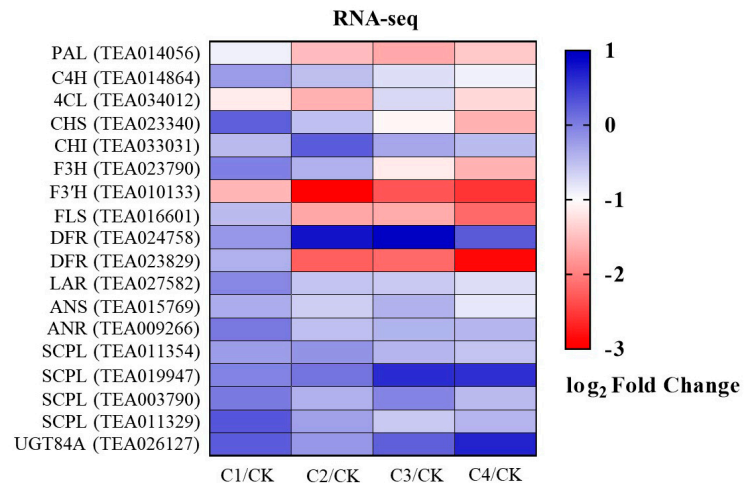

Supplement: s1 [file s1]
